# Supplementary material for: Transcriptomic Analysis of Conserved Telomere Maintenance Component 1 (CTC1) and Its Association with Leukemia
Source: MDPI journal article supplement (doi:10.3390/jcm11195780), 2022-09-29

# Supplementary Materials

## Material and Methods

### Statistical Analysis

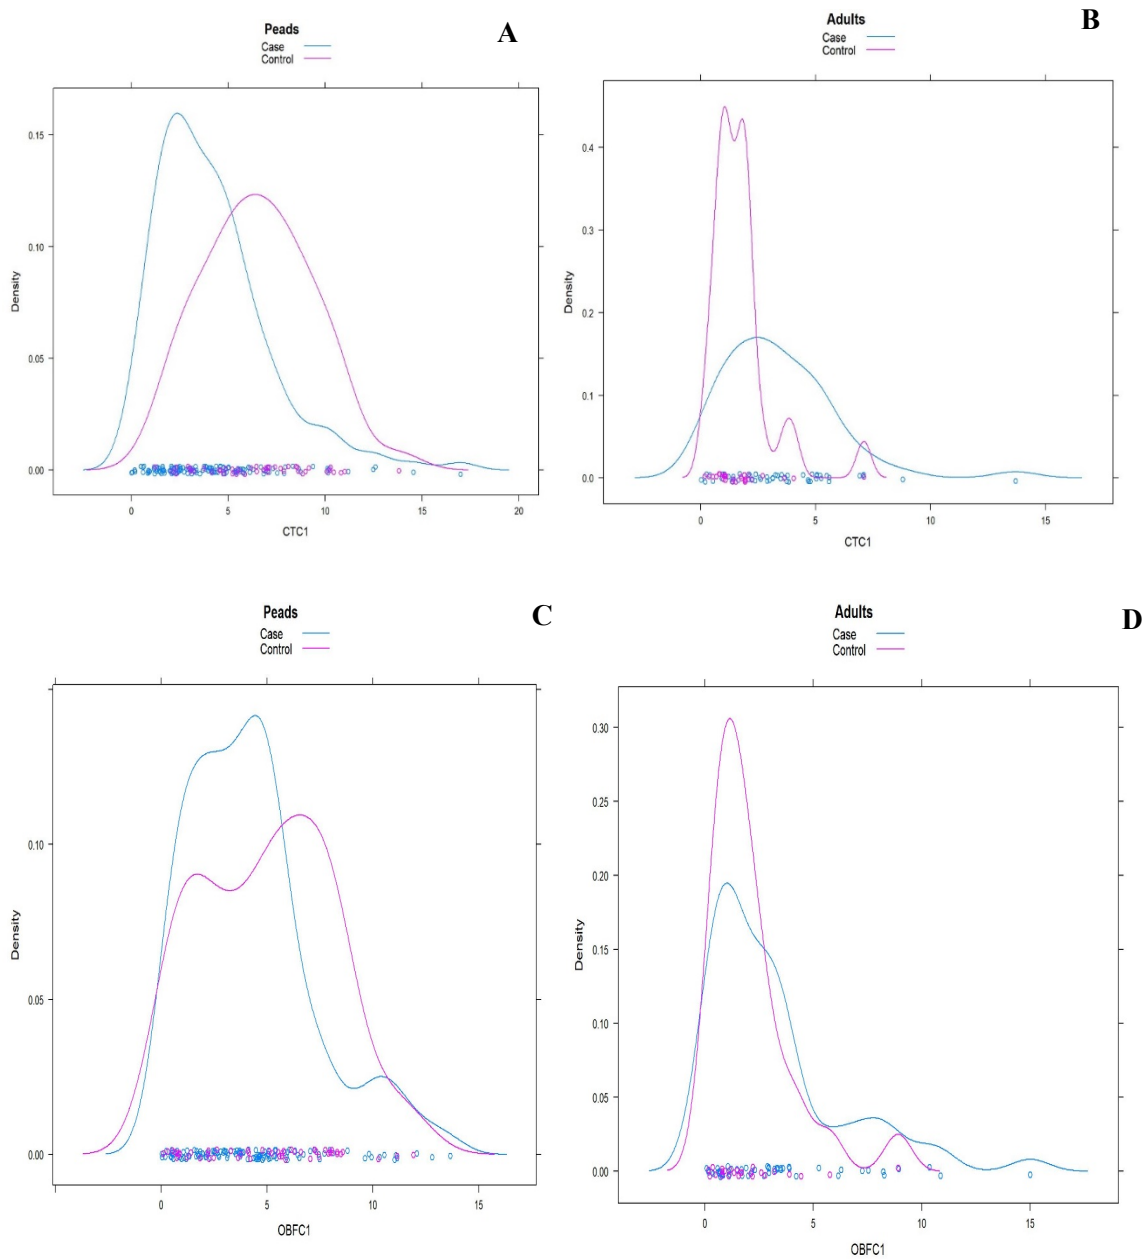

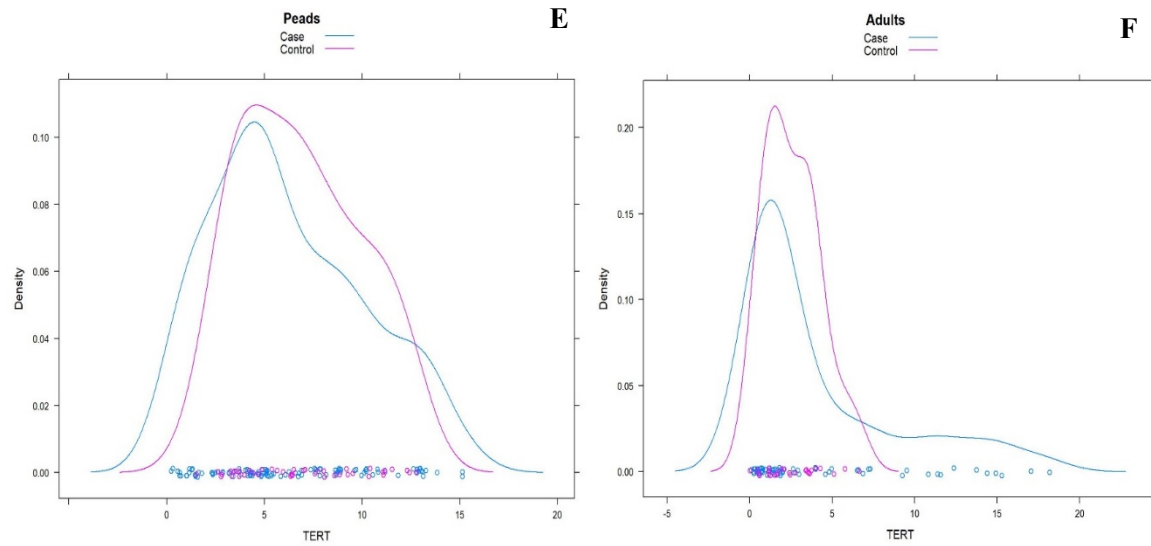

**Supplementary Figure S1. (A–F):** Density plots showing distribution of  $\Delta C_t$  values of CTC1, OBFC1 and TERT genes in control and cases of pediatric and adult groups. A, C, E, = Pediatric groups and B, D, F = Adult groups.

## Results:

**Correlation between the genes (CTC1, OBFC1, TERT) expression and Telomere length in pediatric and adult groups:**

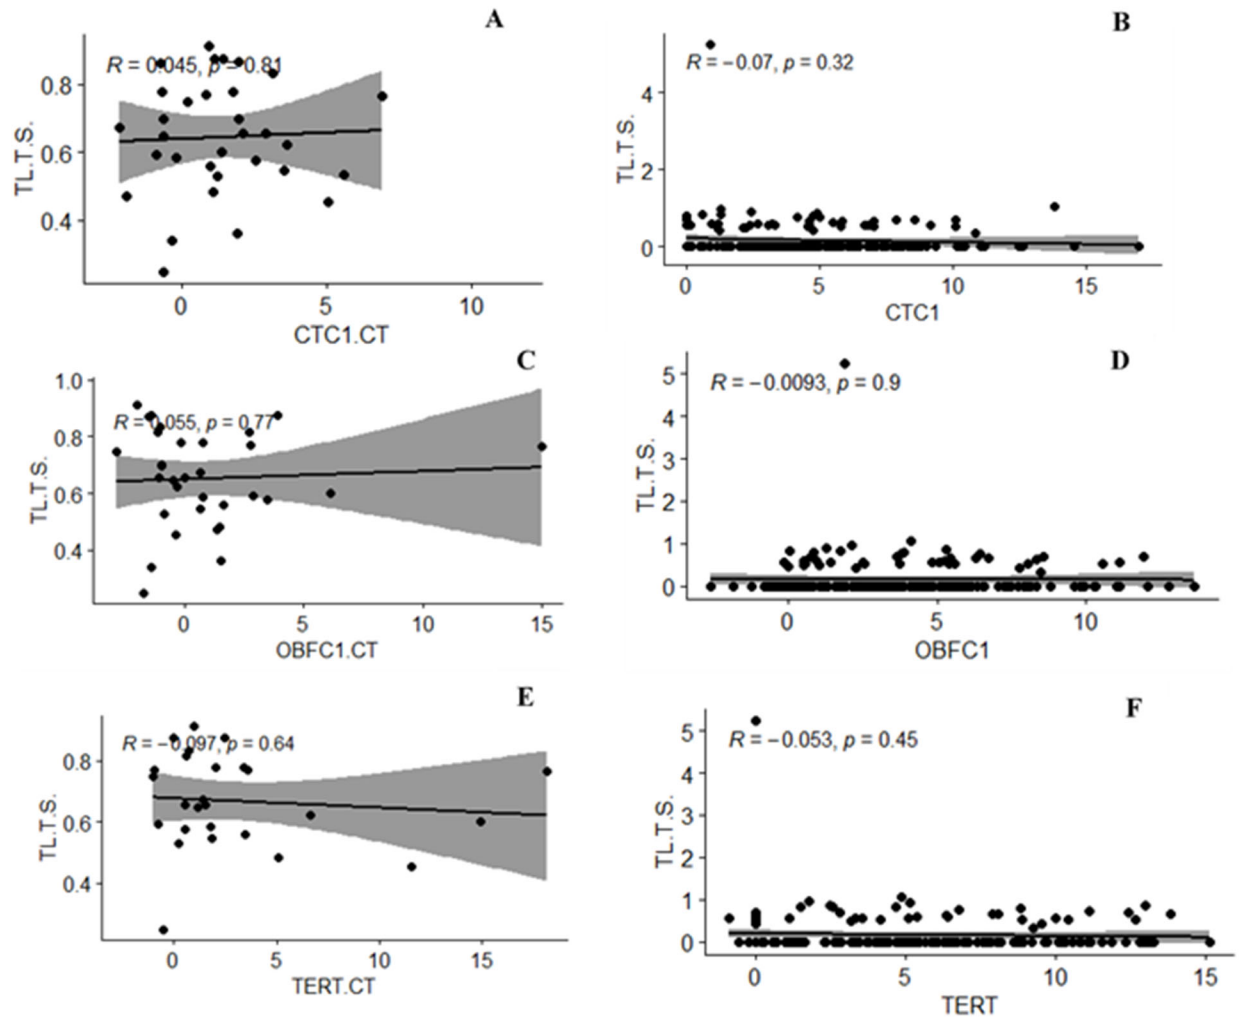

**Supplementary Figure S2. (A–F):** Correlation between genes and telomere length (A-B) CTC1 and TEL, (C-D) OBFC1 and TEL, (E-F) TERT and TEL. A, C, E = Adult groups and B, D, F = Pediatric groups. Non-significant (  $p$  value  $> 0.05$ ) correlation has been noted between the genes and telomere length in pediatric and adult groups.

**Flow Chart showing statistical models in Table 3**

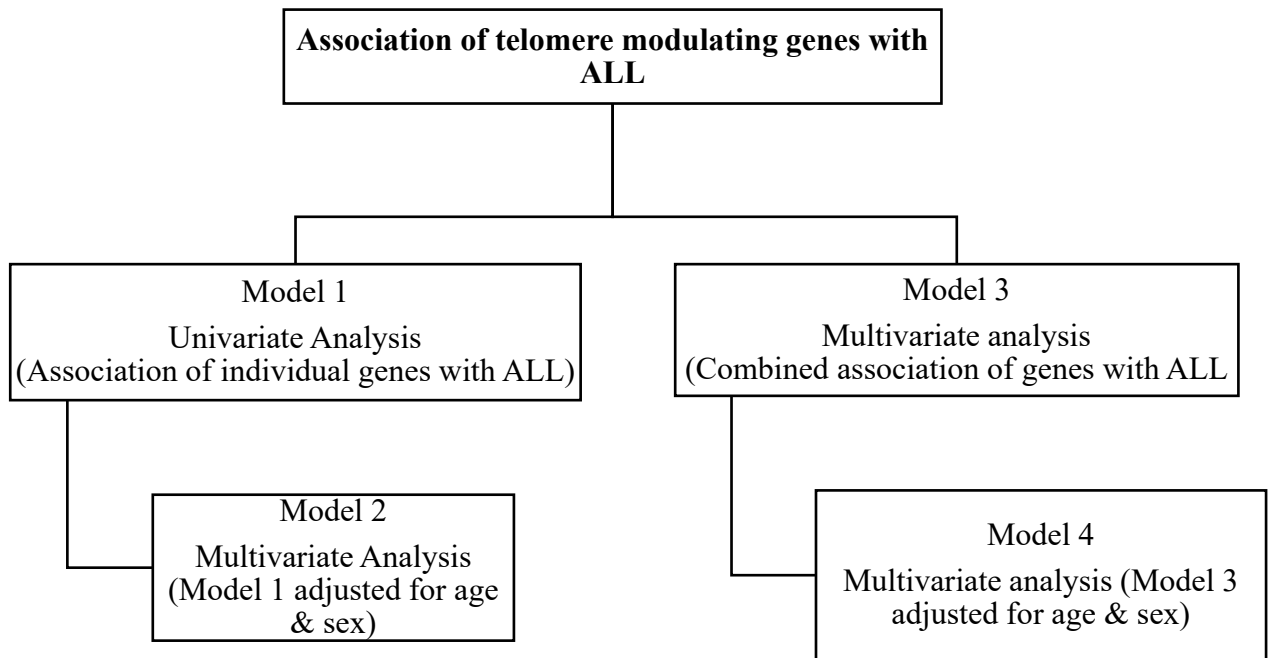

**Flow chart showing statistical models in Table 4**

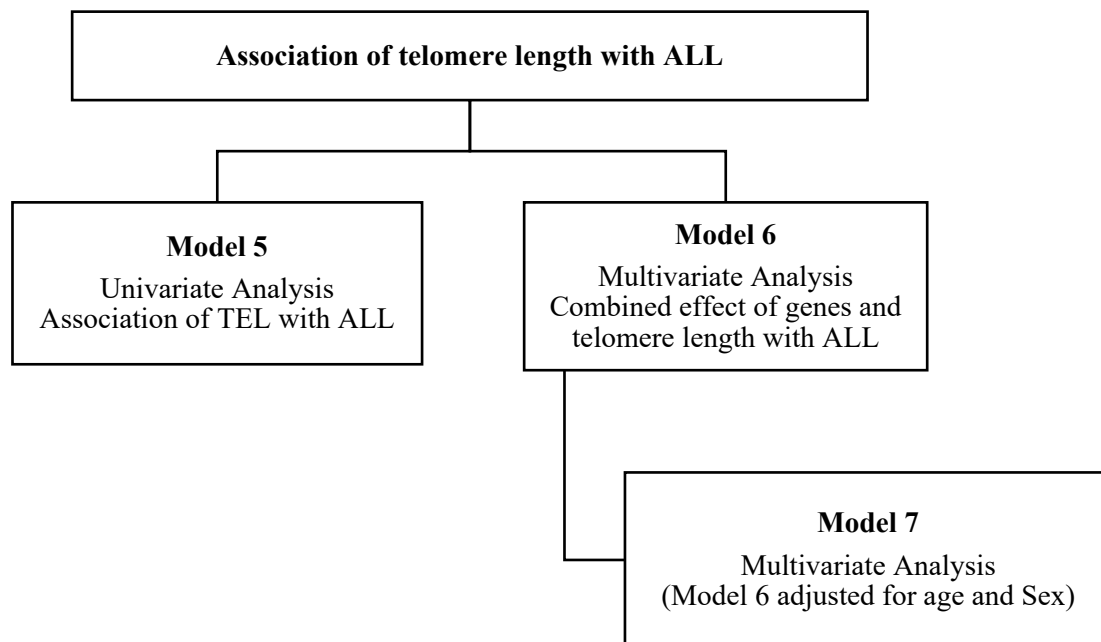

Supplement: s1 [file s1]
